# Supplementary material for: Acarbose Decreases the Rheumatoid Arthritis Risk of Diabetic Patients and Attenuates the Incidence and Severity of Collagen-induced Arthritis in Mice
Source: PubMed Central journal article supplement (PMC4683371; doi:10.1038/srep18288), 2015-12-18
Supplement: srep18288-s1.pdf [file srep18288-s1.pdf]

**Acarbose Decreases the Rheumatoid Arthritis Risk of Diabetic Patients and Attenuates the Incidence and Severity of Collagen-induced Arthritis in Mice**

**Authors:** Chi-Chen Lin, Der-Yuan Chen, Ya-Hsuan Chao, Yi-Ming Chen, Chao-Liang Wu, Kuo-Lung Lai, Ching-Heng Lin, Hsin-Hua Chen\*

**Supplementary materials**

Supplemental Table S1. The mean  $\pm$  SD days of anti-diabetic drug use and statin use during the one year before the index date in RA cases and controls

|                                  | RA cases (n = 723) | Controls (n = 7,230) | P-value |
|----------------------------------|--------------------|----------------------|---------|
| Anti-diabetic drug use           |                    |                      |         |
| $\alpha$ -Glucosidase inhibitors |                    |                      |         |
| Acarbose                         | 14.8 $\pm$ 60.0    | 15.4 $\pm$ 62.8      | 0.806   |
| Miglitol                         | Not use            | 0.1 $\pm$ 4.1        | 0.451   |
| Metformin                        | 142.8 $\pm$ 149.2  | 128.5 $\pm$ 147.2    | 0.013   |
| TZD                              | 19.4 $\pm$ 70.5    | 14.3 $\pm$ 61.3      | 0.062   |
| Insulin                          | 15.7 $\pm$ 76.5    | 5.9 $\pm$ 46.2       | 0.001   |
| Sulphonylurea/meglitinide        | 111.0 $\pm$ 144.7  | 93.9 $\pm$ 138.0     | 0.002   |
| Statin                           | 44.9 $\pm$ 97.9    | 40.4 $\pm$ 91.3      | 0.237   |

Abbreviations: SD, standard deviation; RA, rheumatoid arthritis; TZD, thiazolidinediones.

A *t*-test was used to conduct the analyses.

Supplemental Table S2. Use of other anti-diabetic drugs and statin in high-dose acarbose

users, low-dose acarbose users and non-users

|                               | High-dose acarbose |      | Low-dose acarbose |      | Non-users   |      | P-value |
|-------------------------------|--------------------|------|-------------------|------|-------------|------|---------|
|                               | users (n = 333)    |      | users (n = 333)   |      | (n = 7,287) |      |         |
|                               | Number             | %    | Number            | %    | Number      | %    |         |
| Sulphonylurea/<br>meglitinide | 170                | 51.1 | 189               | 56.8 | 3,087       | 42.4 | <0.001  |
| Metformin                     | 210                | 63.1 | 254               | 76.3 | 4,054       | 55.6 | <0.001  |
| TZD                           | 64                 | 19.2 | 56                | 16.8 | 494         | 6.8  | <0.001  |
| Insulin                       | 23                 | 6.9  | 26                | 7.8  | 188         | 2.6  | <0.001  |
| Statin                        | 124                | 37.2 | 117               | 35.1 | 1,706       | 23.4 | <0.001  |

Abbreviation: TZD, thiazolidinediones.

Acarbose use was further categorized as high- or low-dose based on the median annual dose (i.e.,  $\leq 16,950$  mg,  $> 16,950$  mg).

The Chi-square test was used to compare the proportions of categorical variables among high-dose acarbose users, low-dose acarbose users, and non-users. A p-value of  $<0.05$  was considered statistically significant.

Supplemental Table S3. Multivariate adjusted ORs with 95% CIs for RA risk associated with low- or high-dose acarbose use among different subgroups

| Acarbose       | Subgroup for stratified analysis |                              | Effect modification |
|----------------|----------------------------------|------------------------------|---------------------|
|                |                                  |                              | p-value             |
|                | Men (n = 2,266)                  | Women (n = 5,687)            | 0.839               |
| Non-user       | 1                                | 1                            |                     |
| Low-dose user  | 1.07 (0.53–2.15)                 | 0.99 (0.68–1.45)             |                     |
| High-dose user | 0.52 (0.22–1.20)                 | 0.63 (0.40–0.98)             |                     |
|                | Age ≤ 65 (n = 4,880 )            | Age > 65 (n = 3,073)         | 0.268               |
| Non-user       | 1                                | 1                            |                     |
| Low-dose user  | 1.15 (0.75–1.76)                 | 0.99 (0.58–1.66)             |                     |
| High-dose user | 0.69 (0.43–1.11)                 | 0.43 (0.21–0.89)             |                     |
|                | Periodontitis (n = 1,470)        | No periodontitis (n = 6,483) | 0.832               |
| Non-user       | 1                                | 1                            |                     |
| Low-dose user  | 0.78 (0.30–2.01)                 | 1.06 (0.74–1.52)             |                     |
| High-dose user | 0.77 (0.31–1.88)                 | 0.55 (0.35–0.86)             |                     |
|                | Sulphonylurea/meglitinid         | Sulphonylurea/meglitinide    | 0.302               |

|                | e user (n = 3,446)            | non-user (n = 4,507)              |       |
|----------------|-------------------------------|-----------------------------------|-------|
| Non-user       | 1                             | 1                                 |       |
| Low-dose user  | 1.03 (0.66–1.59)              | 1.03 (0.61–1.74)                  |       |
| High-dose user | 0.44 (0.26–0.77)              | 0.79 (0.44–1.42)                  |       |
|                | Metformin user<br>(n = 4,518) | Metformin non-user<br>(n = 3,435) | 0.607 |
| Non-user       | 1                             | 1                                 |       |
| Low-dose user  | 1.01 (0.70–1.47)              | 0.60 (0.23–1.54)                  |       |
| High-dose user | 0.52 (0.32–0.87)              | 0.79 (0.41–1.51)                  |       |
|                | TZD user (n = 614)            | TZD non-user (n = 7,339)          | 0.052 |
| Non-user       | 1                             | 1                                 |       |
| Low dose user  | 1.34 (0.51–3.53)              | 1.00 (0.69–1.44)                  |       |
| High-dose user | 1.01 (0.40–2.57)              | 0.49 (0.31–0.78)                  |       |
|                | Insulin user (n = 237)        | Insulin non-user (n = 7,716)      | 0.081 |
| Non-user       | 1                             | 1                                 |       |
| Low dose user  | 2.11 (0.71–6.26)              | 0.93 (0.64–1.34)                  |       |
| High-dose user | 0.51 (0.10–2.70)              | 0.56 (0.37–0.85)                  |       |
|                | Statin user (n = 1,947)       | Statin non-user (n = 6,006)       | 0.111 |
| Non-user       | 1                             | 1                                 |       |

|                |                  |                  |
|----------------|------------------|------------------|
| Low-dose user  | 1.21 (0.67–2.20) | 0.97 (0.65–1.46) |
| High-dose user | 0.80 (0.43–1.48) | 0.44 (0.26–0.76) |

---

Abbreviations: OR, odds ratio; CI, confidence interval; TZD, thiazolidinediones.

Acarbose use was further categorized as low- or high-dose based on the median annual cumulative dose (i.e.,  $\leq 16,950$  mg,  $> 16,950$  mg).

Conditional logistic regression model was applied to calculate the ORs with 95% CIs of RA risk associated with acarbose use after adjusting for the duration of diabetes mellitus (DM), DM end-organ disease, Charlson comorbidity index, geographic region, periodontitis history, sulphonylurea/meglitinide use, metformin use, thiazolidinediones use, insulin use and statin use.

The significance of modification of acarbose associated RA protective effect by gender, age ( $\leq 65$  years,  $>65$  years), periodontitis, sulphonylurea/meglitinide use, meformin use, TZD use, insulin use or statin use was assessed using the Wald test to calculate the p-value of the coefficient associated with the product of the indicators of acarbose use and the subgroup.
